# Supplementary material
Source: PubMed Central journal article supplement (PMC7242699)
Supplement: supp_RA120.012614_158185_2_supp_506813_q8l7rw.pdf [file supp_RA120.012614_158185_2_supp_506813_q8l7rw.pdf]

## SUPPORTING INFORMATION

Assorted dysfunctions of endosomal alkali cation/proton exchanger *SLC9A6* variants linked to Christianson syndrome

**Alina Ilie<sup>1</sup>, Annie Boucher<sup>1</sup>, Jaeok Park<sup>2</sup>, Albert Marinus Berghuis<sup>2</sup>, R. Anne McKinney<sup>3</sup> and John Orłowski<sup>1\*</sup>**

<sup>1</sup>Department of Physiology, <sup>2</sup>Department of Biochemistry and <sup>3</sup>Department of Pharmacology and Therapeutics, McGill University, Montreal, Canada

Running title: *Characterization of Christianson syndrome SLC9A6 variants*

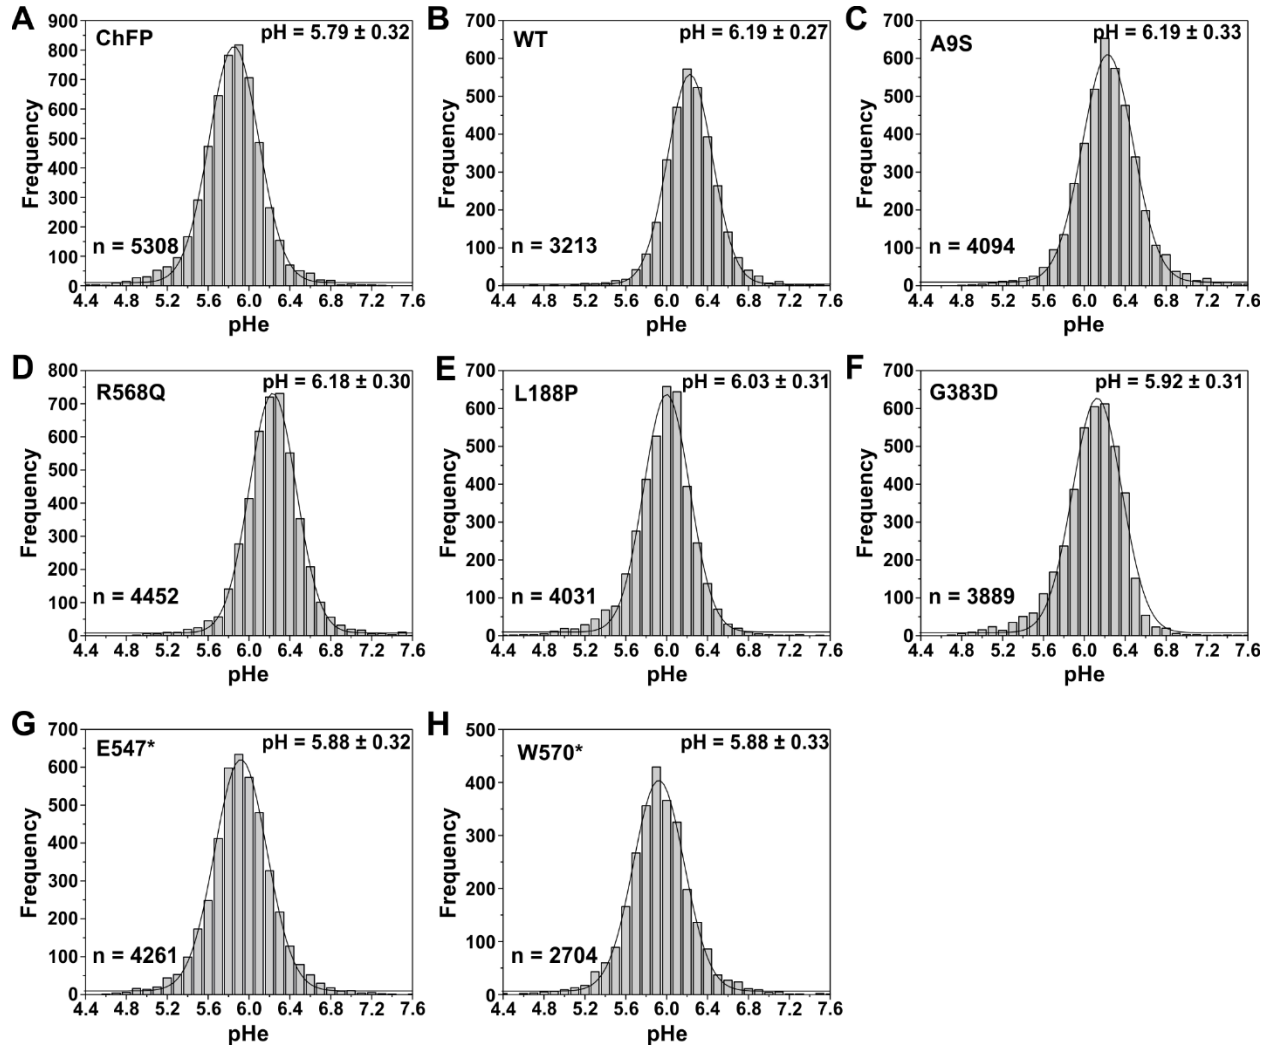

**Figure S1. Assessment of recycling endosomal pH in AP-1 cells expressing NHE6 variants.** Graphical plot of the intraluminal pH of recycling endosomes in AP-1 cells transiently transfected (48 h) with monomeric Cherry fluorescent protein (ChFP), ChFP-tagged NHE6 WT or CS-linked variants. Recycling endosomal pH (pH<sub>e</sub>) was measured by fluorescence ratio image analysis of the internalized pH-sensitive probe fluorescein isothiocyanate-conjugated human transferrin (Tf-FITC). Data represent the frequency of vesicles as a function of their intraluminal pH<sub>e</sub> analyzed from 24 to 36 cells per construct. The total number of vesicles analyzed (n) and the mean vesicular pH<sub>e</sub> (mean ± S.D.) are indicated in the plots.

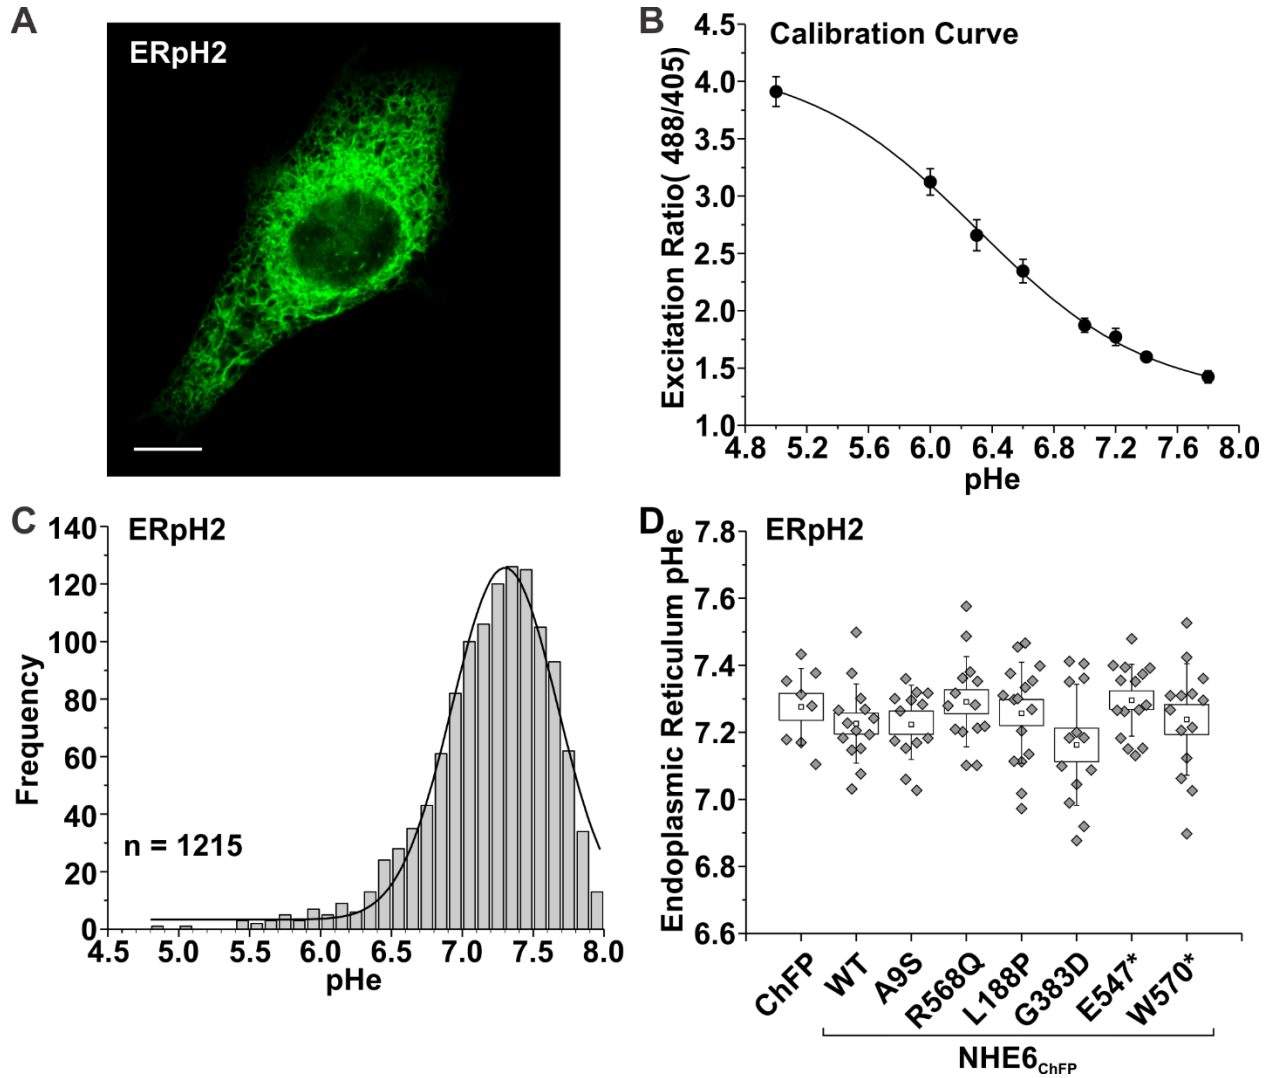

**Figure S2. Assessment of endoplasmic reticulum pH in AP-1 cells expressing NHE6 variants.** *A*, Fluorescence image of AP-1 cells expressing endoplasmic reticulum-targeted pFluorin2 (ERpH2). *B*, *In situ* calibration curve of ERpH2 fluorescence (excitation ratio 488/405) in AP-1 cells as a function of ER pH (pHe) performed by *in situ* clamping intracellular pH between 5 and 7.8. Average intensities of fluorescent puncta or regions of interest (R.O.I., 0.3 to 3  $\mu$ m in diameter; 150-200 R.O.I. per cell) were obtained for both the 405 and 488 channels using MetaXpress software and calculating the 488/405 ratios. *C*, Graphical plot showing the frequency of R.O.I. as a function of their intraluminal pHe analyzed from 8 AP-1 cells (n = the total number of R.O.I. analyzed). *D*, Average ER pHe/cell of AP-1 cells transiently expressing (48 h) ChFP, NHE6<sub>ChFP</sub> WT or CS-linked variants. Data are plotted as a box chart, with the central white square indicating the mean, the box representing the S.E.M. and the error bars showing the S.D. (n = 8-16 cells/construct). Significance was determined by one-way ANOVA with a *post-hoc* Tukey test;  $p > 0.05$ .

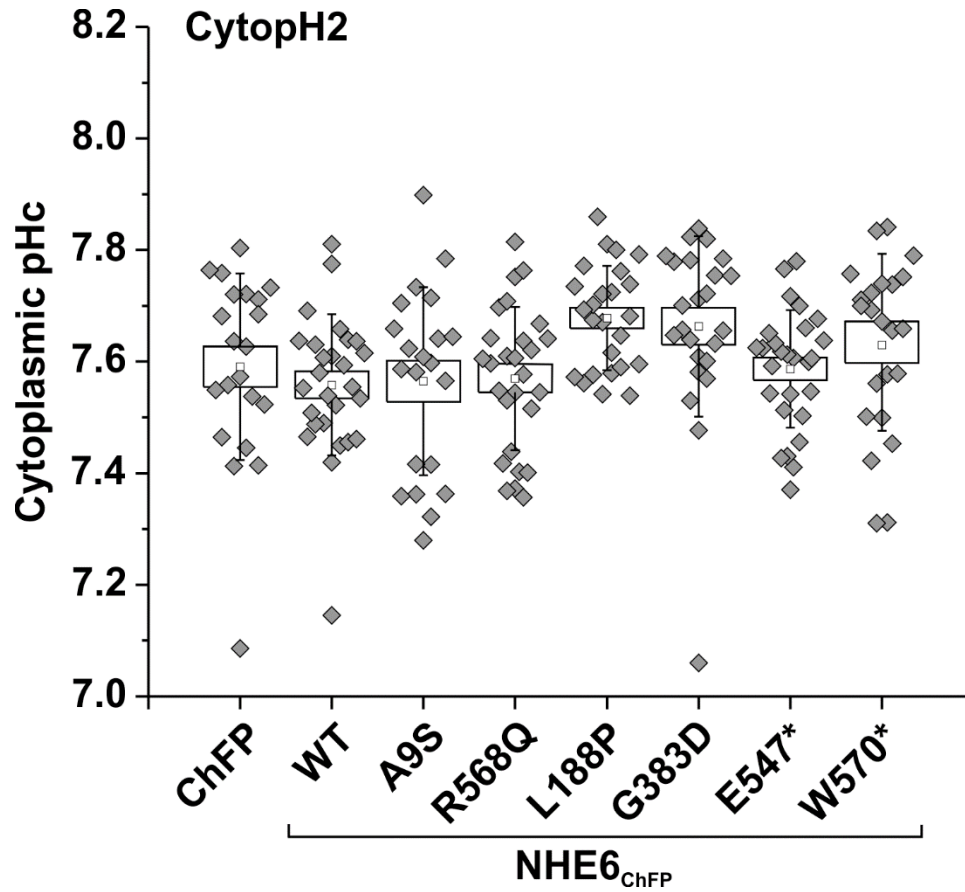

**Figure S3. Assessment of cytoplasmic pH in AP-1 cells expressing NHE6 variants.** Average cytoplasmic pH (pH<sub>c</sub>)/cell of AP-1 cells transiently expressing soluble pHluorin2 (CytopH2) and ChFP, NHE6<sub>ChFP</sub> WT or CS-linked variants. Cytoplasmic pH<sub>c</sub> was measured by fluorescence ratio image analysis of CytopH2 as described in “Experimental Procedures”. Data are plotted as a box chart, with the central white square indicating the mean, the box representing the S.E.M. and the error bars showing the S.D. (n = 21-27 cells/construct). Significance was determined by one-way ANOVA with a *post-hoc* Tukey test; *p* > 0.05.
